# Supplementary material for: Cloud condensation nuclei activity of CaCO 3 particles with oleic acid and malonic acid coatings
Source: Copernicus journal article supplement (doi:10.5194/acp-18-7345-2018), 2018-05-25
Supplement: Supplementary file 1 [file acp-18-7345-2018-supplement.pdf]

Supplement of Atmos. Chem. Phys., 18, 7345–7359, 2018  
<https://doi.org/10.5194/acp-18-7345-2018-supplement>  
© Author(s) 2018. This work is distributed under  
the Creative Commons Attribution 4.0 License.

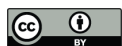

*Supplement of*

## **Cloud condensation nuclei activity of $\text{CaCO}_3$ particles with oleic acid and malonic acid coatings**

**Mingjin Wang et al.**

*Correspondence to:* Tong Zhu (tzhu@pku.edu.cn) and Thomas F. Mentel (t.mentel@fz-juelich.de)

The copyright of individual parts of the supplement might differ from the CC BY 4.0 License.

## Experimental

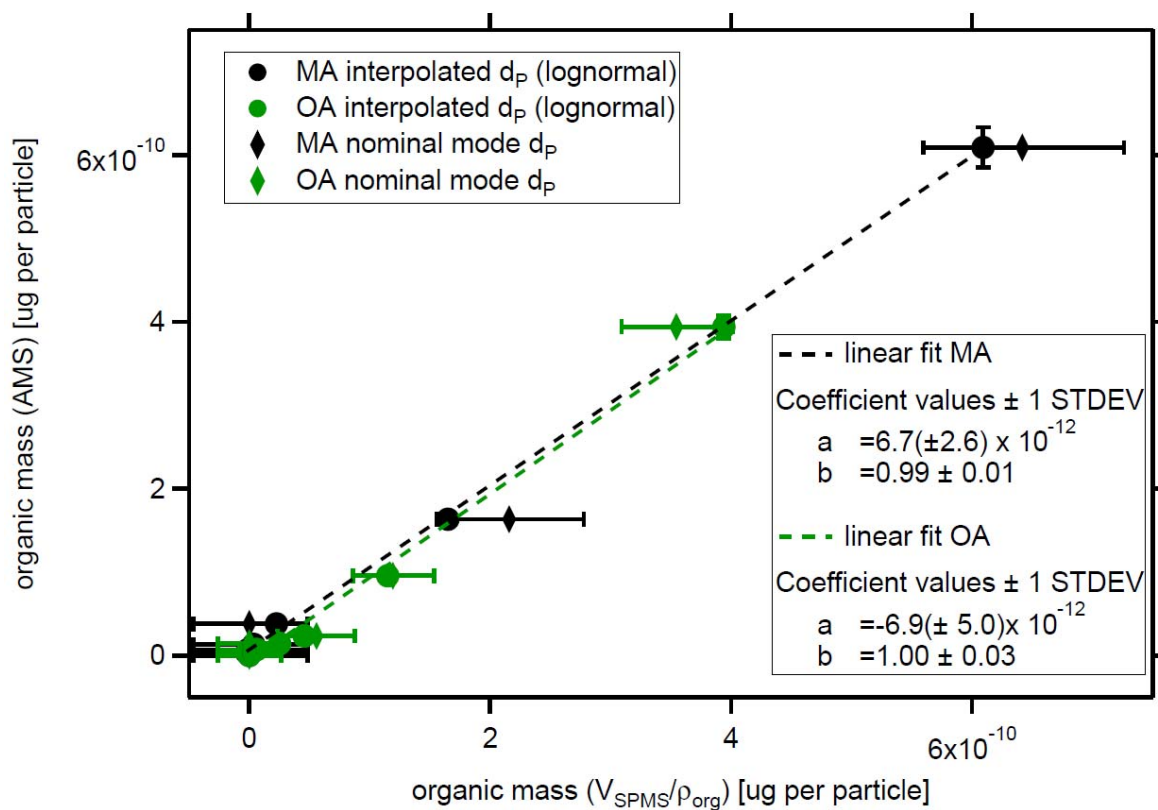

**Figure S1:** Linear relation between organic mass of the coating derived by AMS measurements and the organic coating mass calculated from the SMPS measurements for oleic acid coatings (green) and malonic acid coatings (black). For full circles the organic mass derived by SMPS was calculated from interpolated mode diameters given in Table 1. Error bars in y direction give the reproducibility of the AMS measurements; error bars in x direction indicate the mass span by considering the SMPS bin width for the respective nominal mode diameter. Note that the highest values must be the same as they were used to calibrate the marker  $m/z$  of AMS to the SMPS derived organic mass.

Koehler theory

We assume that at the critical supersaturation ( $SS_{crit}$ ) the solution is ideal, i.e. water activity coefficient is close to 1, and the partial molar volume of water equals the molar volume of pure water  $M_w/\rho_w$ . Since the solubility of  $CaCO_3$  in water is very low (0.00058 g/100 g water, at 298 K), while the solubility of malonic acid (MA) is quite high (62 g/100 g water at 298 K), we apply the linearized approach (e.g. Seinfeld and Pandis 2006), to predict the saturation ratio as a function of the mole solute on a insoluble core:

$$\ln\left(\frac{P_w(D_w)}{P^\circ}\right) = \frac{A}{D_w} - \frac{B}{(D_w^3 - d_u^3)} \quad (S1)$$

In this equation A represents the Kelvin effect while B contains the solute effect:

$$A = \frac{4M_w\sigma_w}{RT\rho_w} \cong \frac{0.66}{T} \quad (in \mu m) \quad (S2)$$

$$B = \frac{6n_s M_w}{\pi\rho_w} \cong 3.44 \times 10^{13} \nu \times n_s \quad (in \mu m^3) \quad (S3)$$

Herein  $P_w(D_w)$  is the water vapor pressure over the droplet of diameter  $D_w$ ;  $P^\circ$  is the water vapor pressure over a flat surface at the same  $T$ ;  $d_u$  is the diameter of insoluble particle fraction, in our case the  $CaCO_3$  core;  $M_w$  is water molecular weight;  $\sigma_w$  is the air-water surface tension;  $\rho_w$  is the water density;  $T$  is in K;  $R$  is the universal gas constant;  $n_s$  is solute moles =  $m_s/M_s$ , with  $M_s$  as solute molecular weight.  $\nu$  is the dissociation degree, i.e. the number of ions resulting from the dissociation of one solute molecule.

We neglected the little dissolvable  $CaCO_3$  and considered only malonic acid molecules for the dynamic growth. The insoluble  $CaCO_3$  core was set to  $d_u = 0.1019 \mu m$  as observed. We further assume that  $CaCO_3$  doesn't react with malonic acid and that the surface tension of the solution at

activation is that of pure water. The dissociation constants  $\text{p}K_{A1}$  and  $\text{p}K_{A2}$  of MA are 2.8 and 5.7 in water, respectively. So MA will partly dissociate in water and in the limit of infinite dilute solutions the dissociation degree  $\nu$  (van' Hoff factor) will be three for full dissociation. The moles of malonic acid coating  $n_s$  was taken from the AMS data in Table 1 and we applied  $\nu = 3$ .

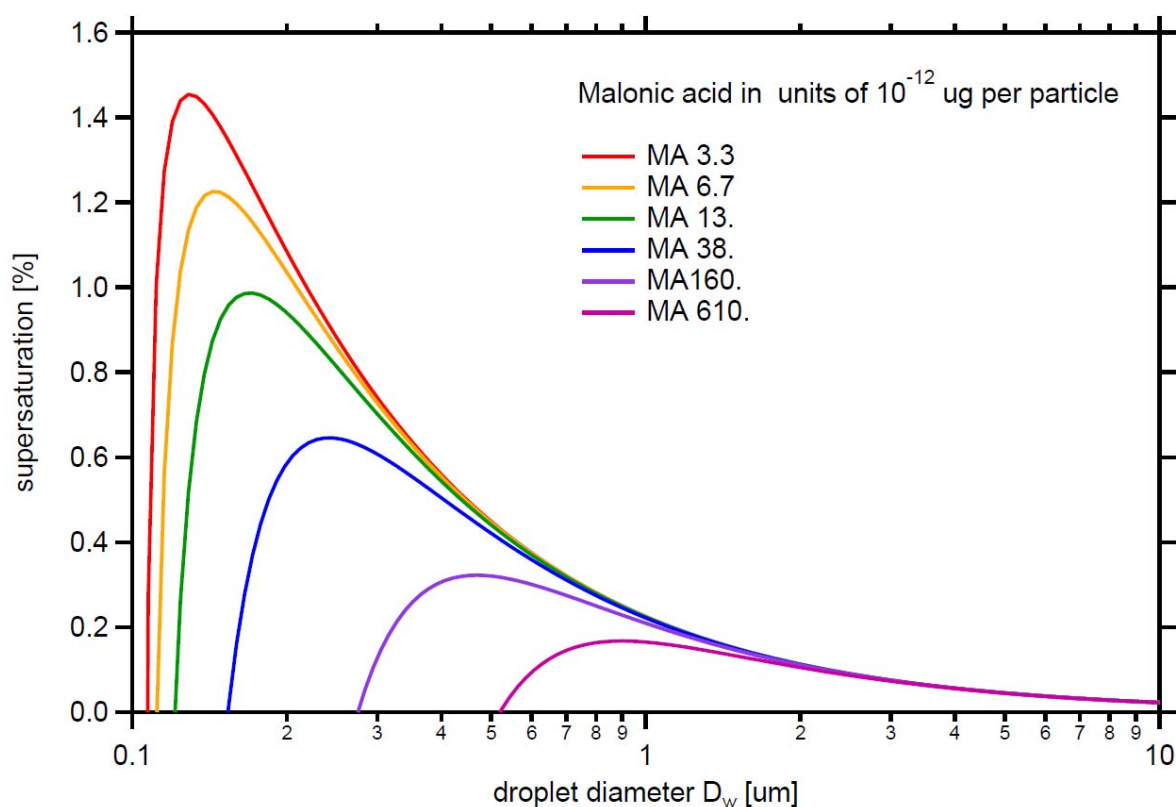

**Figure S2.** Variation of the equilibrium supersaturation over aqueous solution drops containing  $\text{CaCO}_3$  and different mass of malonic acid at 293 K, assuming  $\text{CaCO}_3$  is insoluble and doesn't react with malonic acid and the solution is dilute (water activity coefficient is close to 1). The diameter of insoluble  $\text{CaCO}_3$  is 101.9 nm.

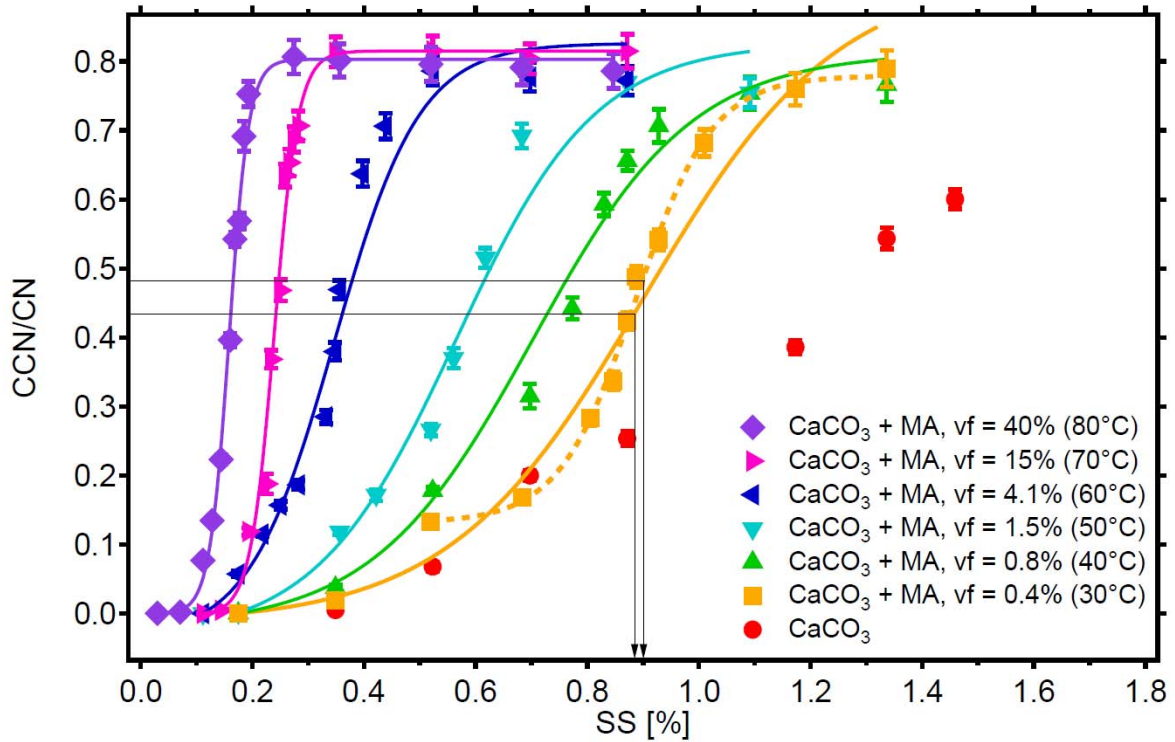

**Figure S3:** Systematic error introduced by neglecting the contribution of multiple charged particles in determining  $SS_{crit}$  by single sigmoidal fits. The multiple charge plateau is best recognizable for the MA coating with the smallest  $vf=0.4\%$  (orange). The difference in  $SS_{crit}$  considering the plateau (0.900% dashed orange line) and neglecting it (0.887% solid orange line) is only 0.013%. The importance of the effect is largest for the smallest  $vf$  and disappears for the largest  $vf$ 's.

**Table S1.** Koehler theory and experimental  $SS_{crit}$  and  $\kappa$  values of  $CaCO_3$  particles with different mass of MA coating.

| Dry diam.<br>(nm) | MA per particle<br>( $\times 10^{-12}$ $\mu g$ ) | Theory<br>$SS_{crit}$ (%) | Experimental<br>$SS_{crit}$ (%) | Theory $\kappa$ | Experimental $\kappa$ |
|-------------------|--------------------------------------------------|---------------------------|---------------------------------|-----------------|-----------------------|
| 102.0             | 3.3 $\pm$ 0.3                                    | 1.44                      | 0.900                           | 0.0021          | 0.0123 $\pm$ 0.0005   |
| 102.1             | 6.8 $\pm$ 1.2                                    | 1.20                      | 0.702                           | 0.0048          | 0.0231 $\pm$ 0.0008   |
| 102.2             | 13 $\pm$ 1.8                                     | 0.97                      | 0.564                           | 0.0099          | 0.0380 $\pm$ 0.0012   |
| 102.7             | 38 $\pm$ 1.6                                     | 0.63                      | 0.347                           | 0.0292          | 0.1063 $\pm$ 0.0023   |
| 107.8             | 160 $\pm$ 8.1                                    | 0.32                      | 0.239                           | 0.1063          | 0.1907 $\pm$ 0.0031   |
| 121.0             | 610 $\pm$ 24                                     | 0.16                      | 0.158                           | 0.3001          | 0.3126 $\pm$ 0.0062   |

**Table S2.** Properties of investigated compounds.

| Name         | Formula                                        | Molecular weight<br>(g mol <sup>-1</sup> ) | Density<br>(g cm <sup>-3</sup> ) | Solubility (g/100 g<br>water, at 298K) | Surface tension<br>(dyn/cm) |
|--------------|------------------------------------------------|--------------------------------------------|----------------------------------|----------------------------------------|-----------------------------|
| Calcite      | CaCO <sub>3</sub>                              | 100.1                                      | 2.71                             | 0.00058                                | - <sup>a</sup>              |
| Malonic acid | C <sub>3</sub> H <sub>4</sub> O <sub>4</sub>   | 104.1                                      | 1.62                             | 62                                     | 69 <sup>b</sup>             |
| Oleic acid   | C <sub>18</sub> H <sub>34</sub> O <sub>2</sub> | 282.5                                      | 0.89                             | Very low                               | 33 <sup>c</sup>             |

a: no data

b: Surface tension of 0.01 mole fraction malonic acid aqueous solution at 298K

c: Surface tension of pure oleic acid at 293K

Lide, 2001; Yalkowsky and He, 2003; Chumpitaz et al., 1999; Hyvarinen et al., 2006.

Chumpitaz, L. D. A., Coutinho, L. F., and Meirelles, A. J. A.: Surface tension of fatty acids and triglycerides, *J. Am. Oil Chem. Soc.*, 76, 379-382, 10.1007/s11746-999-0245-6, 1999.

Lide, D. R.(ed.): *Handbook of Chemistry and Physics*, the 82nd Edition, CRC Press, Boca Raton, FL, 2001.

Hyvarinen, A. R.; Lihavainen, H.; Gaman, A.; Vairila, L.: Ojala, H.; Kulmala, M.; and Viisanen, Y., Surface tensions and densities of oxalic, malonic, succinic, maleic, malic, and cis-pinonic acids, *J. Chem. Engin. Data* 2006, 51 (1), 255-260.

Yalkowski, S. H. and He, Y: *Handbook of aqueous solubility data*, CRC Press, Boca Raton, FL., 2003
